# Supplementary material for: The 2024 Noto Peninsula earthquake building damage dataset: Multi-source visual assessment
Source: Copernicus journal article supplement (doi:10.5194/essd-2024-363), 2025-03-05
Supplement: Supplementary file [file essd-2024-363-AC3-supplement.pdf]

## Response to Referee 1 on ESSD-2024-363

First and foremost, we would like to thank Referee 1 for their kind comments and thorough feedback. I would like to take this opportunity to respond point by point. I would also invite the referee to review the final manuscript and verify whether their queries were duly addressed.

I missed a short explanation of why the most probable hazard type(s) are not included, because in this case study there are so many different hazard types at play which makes it very interesting. It is likely that this was just too difficult, but please mention that, even more so because in Figure 5 you make a distinction between earthquake/tsunami/landslide/fire. It could even be an idea to put the multi-hazard nature in the title, because it may be interesting for others too.

Indeed, this would be a critical aspect of any work investigating the multi hazard nature of the event. Both yourself and Referee 2 showed interest in this specific point. To that effect, we have uploaded a new version of the database (v2.5) to the Zenodo repository. This new version has 4 new attributes:

| Attribute         | Dtype | Description                                                        |
|-------------------|-------|--------------------------------------------------------------------|
| GSI_fire          | Bool  | Whether building intersects GSI (2024) fire-impacted polygon       |
| GSI_slope_failure | Bool  | Whether building intersects GSI (2024) slope failure polygons      |
| GSI_tsunami       | Bool  | Whether building intersects GSI (2024) tsunami inundation polygons |
| USGS_MMI          | Float | Modified Mercalli Index inherited from the USGS (2024) layer       |

While we are not able to make a value judgement of a single most likely hazard, we include the seismic exposure magnitude in Mw for each building, and boolean values for each of the other hazards highlighted in figure 5. We hope this addition achieves a good level of compromise.

### Specific comments

**Introduction:** The introduction starts with an extended description of the Noto Peninsula earthquake and the cascading hazards following the earthquake. A reference to assessment of (specifically) building damage is only found in line 41. As this article is mainly a data paper, it is my suggestion to keep the description of the hazard very brief. More interesting it is to talk about:

Broader context of building damage datasets (similar to the text following L41).

What other previous building damage datasets are already there. Nepal 2015 is an interesting case because crowd-sourcing has also been used, but in a different way, e.g. <https://ieeexplore.ieee.org/abstract/document/7427206>, but also L'Aquila 2009 has been well-documented. You also mention Haiti and Christchurch in the method section that could be moved here.

What is the benefit of specifically your dataset

Well noted, the Introduction has been shortened, focused more on damage, and supplemented with information about similar approaches, including the ones recommended by the referee. In addition the mentions of Haiti and Christchurch were moved here.

Moreover I added some explicit contributions specific to this dataset.

**Methods:** The methods are well-described in the text. However, it could benefit from a better structure. For example, it is not clear what is the point of the 'basis for the assessment' paragraph. It is also confusing that the section 'Earthquake damage assessment' only contains a description of the case study area, while the 'Tsunami damage assessment' also contains other information (like how mismatches are handled). Some suggestions:

Add a short summary of the steps taken in the general methods paragraph (L68-69)

Have a structure similar to (1) data sourcing; (2) building footprint selection (sub-paragraph for tsunami/earthquake) (3) Classification system (4) Verification / Feedback (crowd-sourced + experts)

In the methods, it was also not clear who exactly did the initial damage classification. I assume it was your team?

Well noted. The `basis for the assesment` was renamed `General Methods`, I also added a itemized summary for the assesment process as reccommended.

I added some clarification regarding who conducted the assessment and moved the description of mismatch handling to this section (removed from the Tsunami section) .

**Technical validation:** The first paragraphs of the validation section (L156-170) would fit better in the discussion.

This is well noted, the whole paragraph has been move to the discussion.

**Tables and figures:** The tables and figures are not ordered by first reference, but are scattered through the paper. Please order by first reference.

Well noted. Figures and tables have been reordered by first mention.

### Technical corrections

L3 `Vector polygons` is redundant. Please just use `polygons`.

Well noted.

L8 `Disaster dynamics models` unclear what this means

The lack of clarity is well noted, changed to `disaster-specific physical dynamics models` - examples would be finite element seismic models that aim to simulate structural collapse, full 3D tsunami inundation flow models, etc.

L11;L99;L187;L219: Formulas and mathematical symbols are not correctly exported / not readable.

There seems to be an issue with the post-processed version of the manuscript on the Copernicus side. On my side of the MS records, I can confirm that symbols are rendered in the version of the manuscript that was submitted, the issue appears to be only on the Copernicus preprint version. This does not seem to be a latex issue since at this stage we were asked for a precompiled version rather than the source files.

L36 `in this capacity ...` Sentence doesn't work

Well noted, this has been corrected.

L42 `multi-source` is a key concept, but never formally explained

Well noted, I have added clarification in brackets at this first mention (excluding title and abstract).

L56 What do you mean with a `baseline dataset`

This has been changed to just `dataset`

L59 As the KKC dataset is proprietary, do you know the license of the data and if it can be used for this purpose? If so, please state here, in the methods or in the data availability

Regarding disasters, KKC makes certain data available through their free BOIS portal. The information is specifically released to assist with “recovery and reconstruction activities” and to “confirm hazard information”. For transparency, I provide the original Japanese as found at their website and my best translation below:

**OR:** 撮影箇所が地図上にプロットされ、地図上の位置や地形と合わせて現地の状況が一目で判るため、復旧・復興活動に役立てることができます。さらにハザード情報などのコンテンツも併せて確認することができます。※コンテンツは順次公開予定

**TR:** "Image capture locations are plotted on a map, making it easy to see the local situation at a glance, including the position on the map and the surrounding terrain, which is useful for recovery and reconstruction activities. Furthermore, you can also check content such as hazard information. Content will be released sequentially."

KKC requires that users make a formal request <https://www.kkc.co.jp/contact/image> in case they wish to employ the imagery provided through BOIS. Additionally KKC reserves the rights to charge a fee depending on the use-case.

L55-L66 there is no mention of the media photos that are mentioned in the abstract

In the abstract we mention news reporting imagery, these sources are given in lines 96 - 99 [formerly 85-86] (Minami 2024, Nikkei xTECH 2024). As of April 9, the articles are still accessible through the links in the references, however we keep a pdf version of the articles for posteriority.

Figure 2: what does multi-modal mean here?

Multi-modal refers to the modality of the media we employed to perform our classification: in the example given modality 1 is the orthophoto (GSI), and modality 2 is the oblique (KKC). Each modality adds to our analysis, for example it can be hard to distinguish some collapse if it's relatively clean and vertical, the oblique helps identify these edge cases, and allows us to appraise lateral damage. Multi-modal is congruent with multi-source in this case, since we worked with only two sources each providing one mode, but it is not necessarily mutually exclusive.

L88 Tsunami-affected areas are introduced in the next section, why are they mentioned here

Well noted. The project began as a tsunami-only investigation and expanded beyond that later, in the ‘Basis for the assessment’ section we aimed to provide a rationale regarding the inception of the project. I have changed L88 to better reflect this.

L102 ‘Although this ... vertical images’: this sentence is unclear, what do you mean?

This sentence has been changed to be more clear. The crux of the argument (exemplified in Figure 7) is that satellite images that have some (spatial overlap, but were taken on different days show different blue-tarp coverage: for example some tarps are apparently removed, many are added, some become indistinguishable. We considered adding a separate class for tarp-covered structures (beyond 0 and 1) as indicated by Miura et al. (2020) but we were not able to guarantee consistency.

Figure 8: Hard to read. It's difficult to see the blue/red differences (and what do they mean? Are mismatches in red?)

Well noted. In the original right pane the colors correspond to the classes (0, 1, 9, 99) respectively blue, red, yellow, and white. While in the left pane we show the original polygons provided by GSI. The intention was to show the difference.

In hindsight, as pointed out, the colors do not serve the purpose of the figure. I have modified the figure to use a binary color scheme: yellow to indicate the original GSI polygons and Purple to indicate the polygons corresponding to buildings that actually existed in the most recent pre-disaster imagery. Purple polygons consist of either: formerly yellow polygons that actually existed in the pre disaster imagery or new polygons hand-drawn and based on the pre-disaster imagery.

I have also changed the base-map to use a grayscale color scheme and increased the contrast to improve clarity.

L240 the statement here counters the statement made in L189. If your method is robust also in areas without multi-source input, why would it be better than just a single-source approach?

Absolutely. The statement in L240 mischaracterizes the study and has been corrected, we thank the referee for pointing out the oversight.

To clarify: It is not our intention to claim that the present method is in any shape or form superior to other methods.

Rather, we hoped to show that, by having access to multi-source information and survey information, we have the ability to check that our classification appears to be robust across the domain. This gives us a relatively greater degree of confidence in areas that are single source.

Moreover, it must be pointed out that, our results are predicated on the specific data that was available to us for this project, the capabilities of our team, and subsequent survey information that aided our validation.

I would like to express again my appreciation for the time and attention that the referee dedicated to the manuscript. I hope I was able to answer in a satisfactory manner through this direct response to comments and in text.
